# Supplementary material for: Prophylactic Therapy of Silymarin (Milk Thistle) on Antituberculosis Drug-Induced Liver Injury: A Meta-Analysis of Randomized Controlled Trials
Source: Can J Gastroenterol Hepatol. 2019 Jan 10;2019:3192351. doi: 10.1155/2019/3192351 (PMC6348824; doi:10.1155/2019/3192351)
Supplement: Supplementary Materials — Supplementary Figure 1: subgroup analysis of the occurrence of anti-TB DILI based on blinded or open-labelled study designs. (a) Follow-up at week 4. (b) Follow-up at week 8. Supplementary Figure 2: (a) forest plot of sensitivity analysis in the meta-analysis; (b) funnel plot for the effect of silymarin on the occurrence of anti-TB DILI. Supplementary Table 1: PRISMA 2009 Checklist. [file 3192351.f1.zip]

Archive with 6 entries (5 files):
- 3192351.f1/
- 3192351.f1/SUPPLEMENTARY FIGURE 1 (a)_CJGH_2626281.eps
- 3192351.f1/SUPPLEMENTARY FIGURE 1(b)_CJGH_2626292.eps
- 3192351.f1/SUPPLEMENTARY FIGURE 2(a)_CJGH_2626293.eps
- 3192351.f1/SUPPLEMENTARY FIGURE 2(b)_CJGH_2626294.eps
- 3192351.f1/SUPPLEMENTARY TABLE 1_CJGH_2626295.docx
